# Supplementary material for: In vitro characterization of mitochondrial function and structure in rat and human cells with a deficiency of the NADH: ubiquinone oxidoreductase Ndufc2 subunit
Source: PubMed Central journal article supplement — Hum Mol Genet. 2017 Aug 30;26(23):4541–55. doi: 10.1093/hmg/ddx333 (PMC5886163; doi:10.1093/hmg/ddx333), 2017-08-30
Supplement: hmg-2017-d-00637_r1_supplementary_file_ddx333.pdf [file hmg-2017-d-00637_r1_supplementary_file_ddx333.pdf]

1    **In vitro characterization of mitochondrial function and structure in rat and human cells with**  
2    **a deficiency of the NADH:ubiquinone oxidoreductase Ndufc2 subunit.**

3

4    Salvatore Raffa<sup>1,4</sup>, Cristina Scrofani<sup>1</sup>, Sabatino Valente<sup>1</sup>, Andrea Micaloni<sup>1</sup>, Maurizio Forte<sup>2</sup>, Franca  
5    Bianchi<sup>2</sup>, Roberta Coluccia<sup>2</sup>, Aron M. Geurts<sup>3</sup>, Sebastiano Sciarretta<sup>5</sup>, Massimo Volpe<sup>1,2</sup>, Maria  
6    Rosaria Torrisi<sup>1,4</sup>, Speranza Rubattu\*<sup>1,2</sup>

7

8

9        1. Department of Clinical and Molecular Medicine, School of Medicine and Psychology,  
10        Sapienza University of Rome, Rome, Italy;

11        2. I.R.C.C.S. Neuromed, Pozzilli (Isernia), Italy;

12        3. Department of Physiology and Human and Molecular Genetics Center, Medical College of  
13        Wisconsin, Milwaukee, WI, USA.

14        4. Cellular Diagnostics Unit, Azienda Sant'Andrea University Hospital, Rome, Italy.

15        5. Department of Medical-Surgical Sciences and Biotechnologies, Sapienza University of  
16        Rome, Latina, Italy.

17

18    \*Corresponding author:

19    Speranza Rubattu

20    Dept. of Clinical and Molecular Medicine

21    School of Medicine and Psychology. Sapienza University, Rome, Italy

22    IRCCS Neuromed, Pozzilli, Italy

23    Tel. 0039 06 33775979; Fax 0039 06 33775061

24    e-mail: [rubattu.speranza@neuromed.it](mailto:rubattu.speranza@neuromed.it)

25

**a. Performing the characterization of fibroblast primary cultures from the *Ndufc2* knockout rat model**

To analyze the biological characteristics of primary cells, we used all cultures at the second passage (P2) to avoid in vitro differentiation (Leone L. et al; doi: 10.1371/journal.pone.0146365).

The mesenchymal immunophenotype of the primary cultures was verified by immunofluorescence assessment of the expression of vimentin, a component of the intermediate filaments widely used as a fibroblast marker. The analysis showed that all cultures were characterized by a strong staining for vimentin, displaying a signal compatible with the structure and localization of perinuclear cytoplasmic bundles of filaments (Supplementary Fig. 1A). To confirm the purity of cultures, we ruled out the presence of epithelial cells by assessment of the cytokeratins expression, components of the epithelial intermediate filaments; no signal was detected in all isolated primary cultures (Supplementary Fig. 1A).

To evaluate the degree of fibroblasts differentiation, we used a morphological characterization to distinguish in vitro the differentiation stages based on distinct morphological features and we calculated the L:E differentiation index, as defined in Materials and Methods. The quantitative analysis revealed that the L:E ratio was homogeneous, with no appreciable differences among all fibroblast cultures (median of L:E index: 0.83 vs 0.85 for SHRSR and SHRSR\_KO *Ndufc2*, respectively; p=NS; Supplementary Fig. 1B).

To better evaluate the differentiated phenotype of all fibroblast cultures, we analyzed by quantitative immunofluorescence the percentage of positive cells for the expression of  $\alpha$ -smooth muscle actin, the most commonly used marker for activated and differentiated fibroblasts. Both fibroblast cultures from KO and WT rats displayed a percentage of positive staining for the  $\alpha$ -SMA close to 25%, with fluorescent signal localized in the peripheral areas of the cytoplasm, representative of an higher content of actin bundles (median of  $\alpha$ -SMA positive staining: 23.2% vs 26.9% for SHRSR and SHRSR\_KO *Ndufc2*, respectively; p=NS; Supplementary Fig. 1C).

58 To verify the typical ultrastructural features of primary fibroblasts, all cultures were analyzed by  
59 transmission electron microscopy (TEM). The cells showed a typical spindle-like shape and a  
60 cytoplasm with a few rough endoplasmic reticulum cisternae and intracellular filaments; in  
61 addition, some fibroblasts were characterized by a cytoplasm with very abundant organelles,  
62 numerous cisternae of rough endoplasmic reticulum and evident intracellular filaments, also  
63 organized in bundles, localized near the plasma membrane, and consistent with differentiated  
64 fibroblasts (Supplementary Figs. 1E-G)

65 Taken together, these data showed that no appreciable morphological, immunophenotypic and  
66 ultrastructural findings were observed between fibroblast cultures from SHRSR\_WT and  
67 SHRSR\_KO *Ndufc2* rats.

68 **b. KCTD21 and NDUFC2 expression study in a larger group of healthy subjects**

69 For this purpose we recruited an overall number of 34 subjects (n=34) homozygous for the major  
70 allele (TT/rs11237379; n=9), heterozygous (TC/rs11237379; n=16), or homozygous for the minor  
71 allele (CC/rs11237379; n=9). Genotype assessment for the NDUFC2 variant was performed as  
72 previously reported (Rubattu S. et al.; doi: 10.1161/JAHA.115.002701). Analysis of NDUFC2  
73 expression was performed by RTPCR of cDNA using specific oligonucleotides following  
74 previously published procedures (Rubattu S. et al.; doi: 10.1161/JAHA.115.002701). Primers used  
75 for KCTD21 were the following: KCTD21 forward GAG GGC AGG AGG ACT ACT T; KCTD21  
76 reverse GTC GCC AGT GAG GTT GTA TAG. The amount of cDNA target was calculated using  
77 GAPDH (primer for: CAAGGCTGTGGGCAAGGT; primer rev: GGAAGGCCATGCCAGTGA)  
78 as housekeeping gene.

79

80

81

82

83

84 **Legend to Supplementary Figure 1**

85 **Characterization of fibroblast primary cultures from the *Ndufc2* knockout rat model**

86 (A) Morphological evaluation (DIC) and immunofluorescence analysis of expression of vimentin  
87 and cytokeratins on a representative sample of fibroblast cultures isolated from the mesenchymal  
88 tissue of SHRSR and SHRSR\_KO *Ndufc2*. In all cultures, the cells showed a strong staining for the  
89 mesenchymal marker vimentin (red), which appears as perinuclear cytoplasmic bundles of  
90 filaments. No fluorescent signal was detected for cytokeratins (green), ruling out the presence of  
91 epithelial cells in the cultures. Nuclei are stained with DAPI (blue).

92 (B) Morphological evaluation of the differentiation degree of fibroblasts cultures by differential  
93 interference contrast microscopy. The quantitative analysis revealed that the L:E differentiation  
94 index was homogeneous among both cultures. The scatter dot-plot showed the percent of L:E ratio  
95 values obtained from three independent experiments for each culture; the median values and the  
96 interquartile ranges of the groups are indicated (Kruskal-Wallis test:  $\wedge p=NS$  versus SHRSR\_WT).

97 (C) Evaluation of  $\alpha$ -smooth muscle actin expression. The immunofluorescence analysis of the  
98 expression of the differentiation marker  $\alpha$ -SMA showed a signal localized in intracellular filaments,  
99 also organized in bundles, situated in the peripheral cytoplasmic areas of the cells. The quantitative  
100 analysis displayed a similar percentage of positive staining in both fibroblast cultures (scatter dot-  
101 plot with median values and interquartile ranges of  $\alpha$ -SMA staining; Kruskal-Wallis test:  $\wedge p=NS$   
102 versus SHRSR\_WT).

103 (D-G) Ultrastructural features of the cell cultures. Both the fibroblasts isolated from skin of  
104 SHRSR\_WT (D-E) and SHRSR\_KO *Ndufc2* (F-G) showed a typical spindle-like shape with  
105 cytoplasm characterized by high cytoplasmatic complexity, with abundant organelles and  
106 intracellular filaments localized in the peripheral areas of the cell, near the plasma membrane,  
107 consistent with the intracellular localization of  $\alpha$ -smooth muscle actin. (TEM micrographs, uranyl  
108 acetate/lead citrate; Legend: Nu, nucleus; NM, nuclear membrane, PM, plasma membrane; Mt,  
109 mitochondrion, IFb, intermediate filament bundles; rER, rough endoplasmic reticulum).

110 **Legend to Supplementary Figure 2**

111 **NDUFC2 expression study in a larger group of healthy subjects and GTEx analysis**

112 (A) NDUFC2 expression, assessed by RTPCR, in PBMCs of the subjects used for all *in vitro*  
113 studies described in the main text (n=6 for each rs11237379/NDUFC2 genotype).

114 \*\*P<0.001 for both CT and TT versus CC genotype. Values are expressed as means  $\pm$ SEM.

115 (B) Box plots from Genotype-Tissue Expression GTEx for brain NDUFC2 and KCTD21. The  
116 GTEx Project was supported by the Common Fund of the Office of the Director of the National  
117 Institutes of Health, and by NCI, NHGRI, NHLBI, NIDA, NIMH, and NINDS. The data used for  
118 the analyses described in this manuscript were obtained from: the GTEx Portal on 06/20/17

119 (C) NDUFC2 and KCTD21 expression assessed by RTPCR in PBMCs of a larger group of healthy  
120 subjects carrying the three genotypes for rs11237379/NDUFC2.

121 \*\*P<0.001 for both CT and TT versus CC genotype. Values are expressed as means  $\pm$ SEM.

122

A

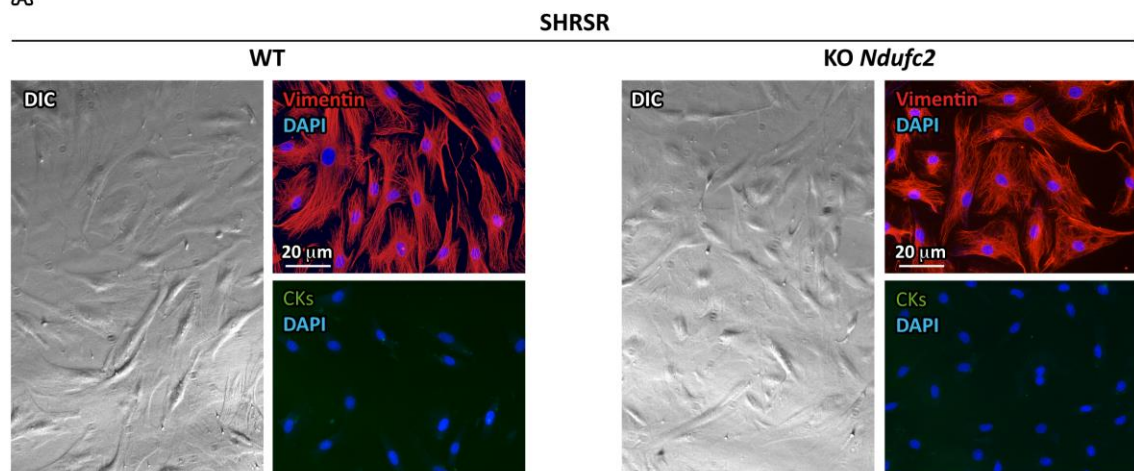

B

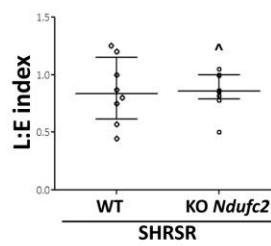

C

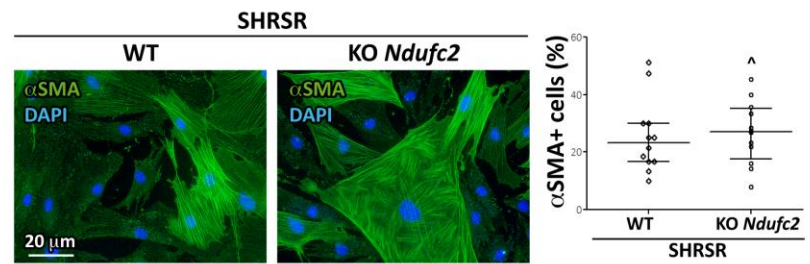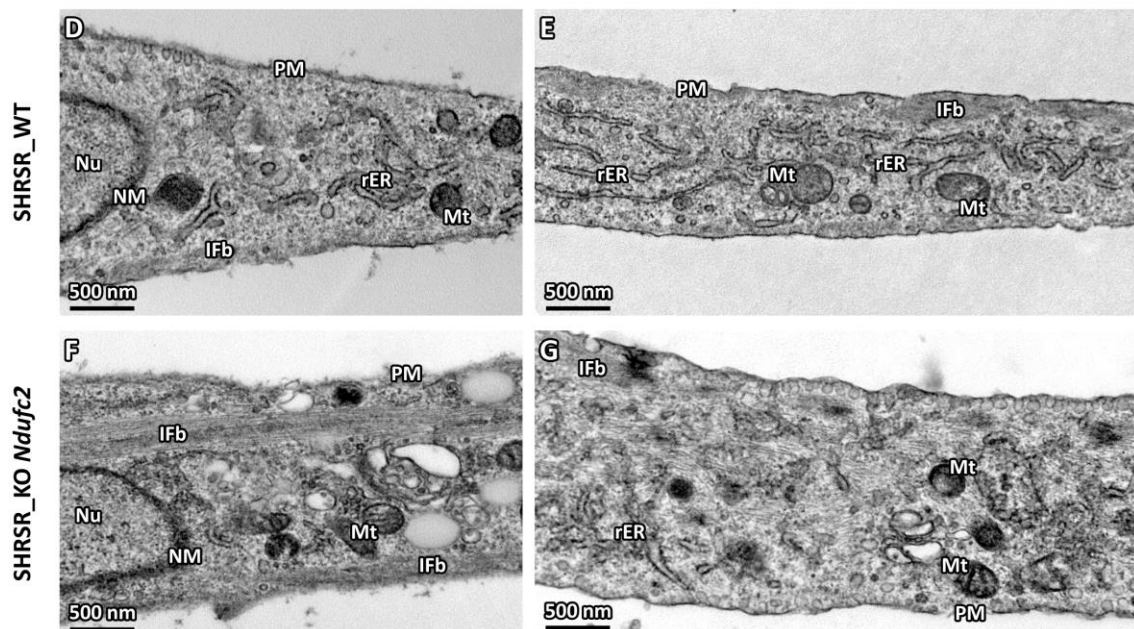

Supplementary Fig. 1

A

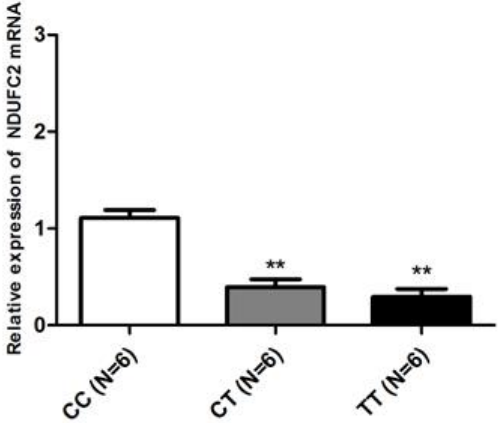

B

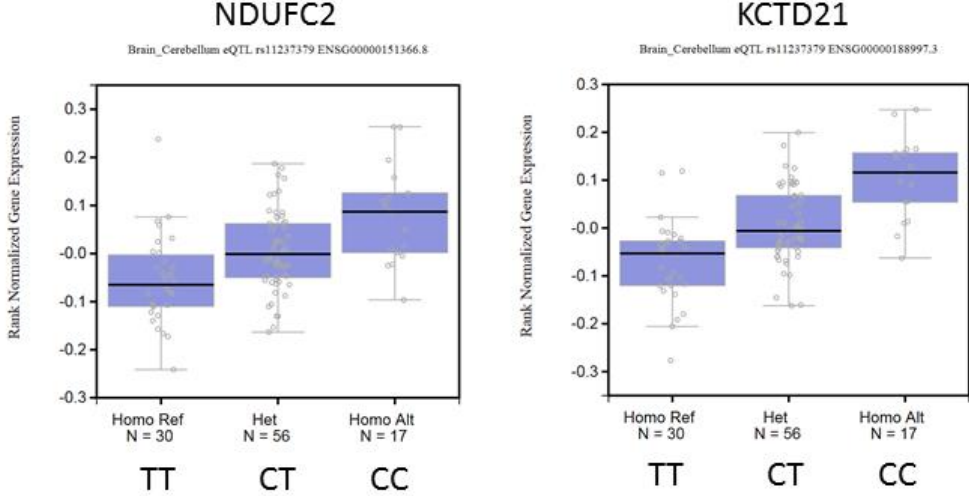

C

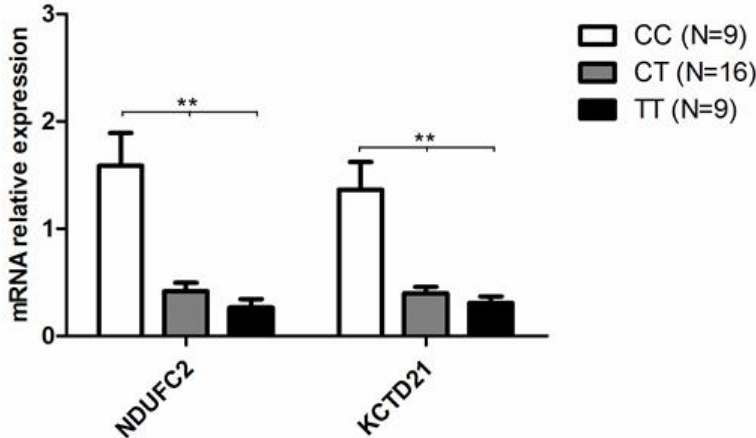

Supplementary Fig. 2
